# Supplementary material for: Mimicking the oxygen minimum zones: stimulating interaction of aerobic archaeal and anaerobic bacterial ammonia oxidizers in a laboratory-scale model system
Source: PubMed Central journal article supplement (PMC3558802; doi:10.1111/j.1462-2920.2012.02894.x), 2012-10-12
Supplement: emi0014-3146-SD1.pdf [file emi0014-3146-SD1.pdf]

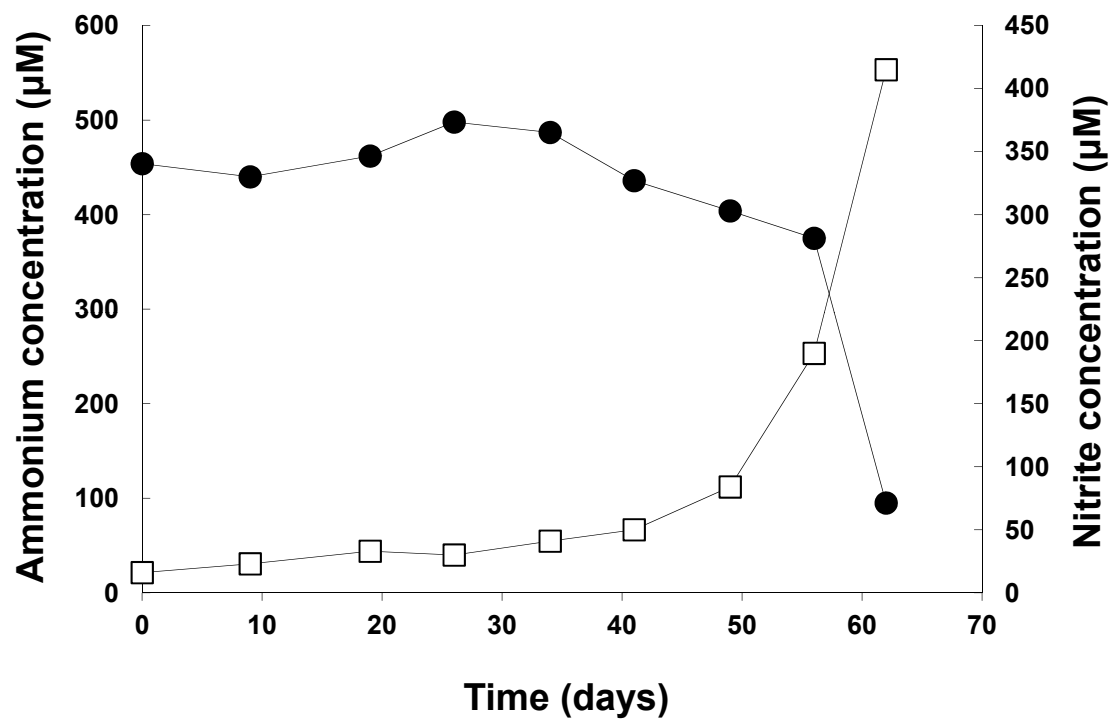

**Fig. S1.** Concentrations of ammonium (●) and nitrite (□) in the preculture of *Nitrosopumilus maritimus*.

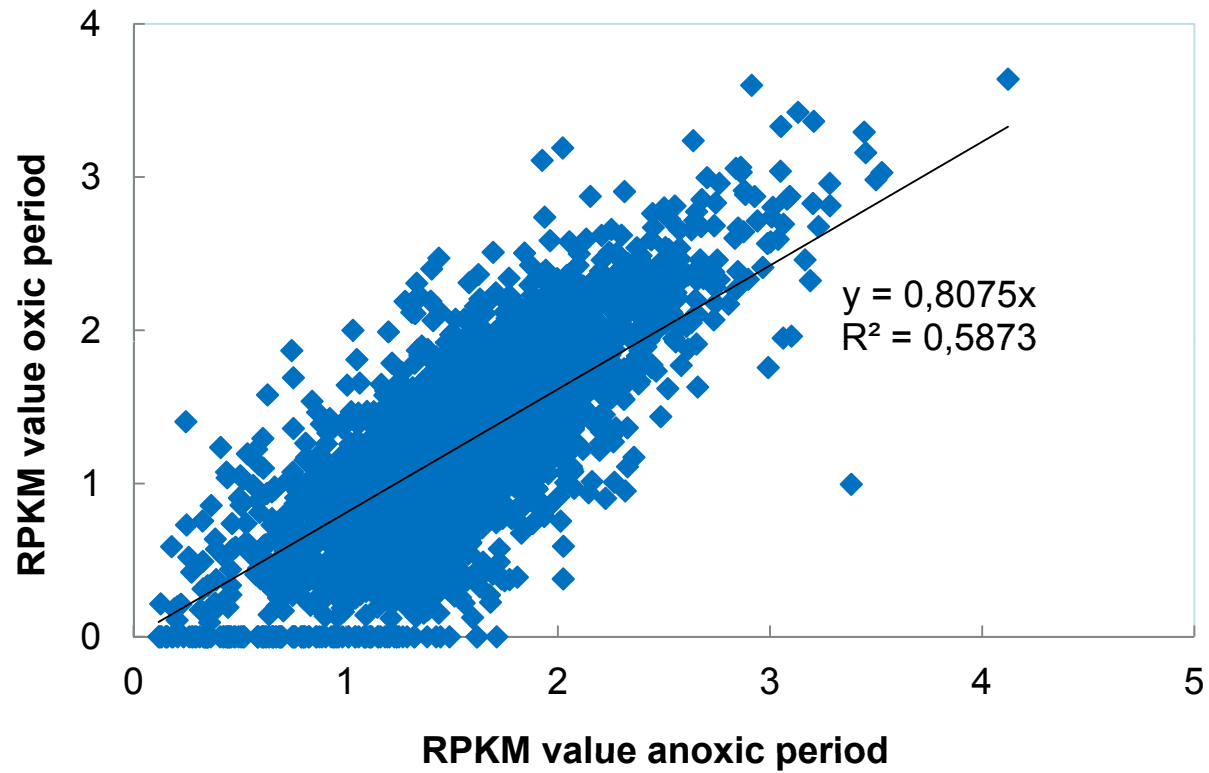

**Fig. S2.** Gene expression of “*Ca. Scalindua profunda*” anammox bacteria under anoxic versus oxic condition. RPKM = number of reads per kb of transcript per million mapped reads.

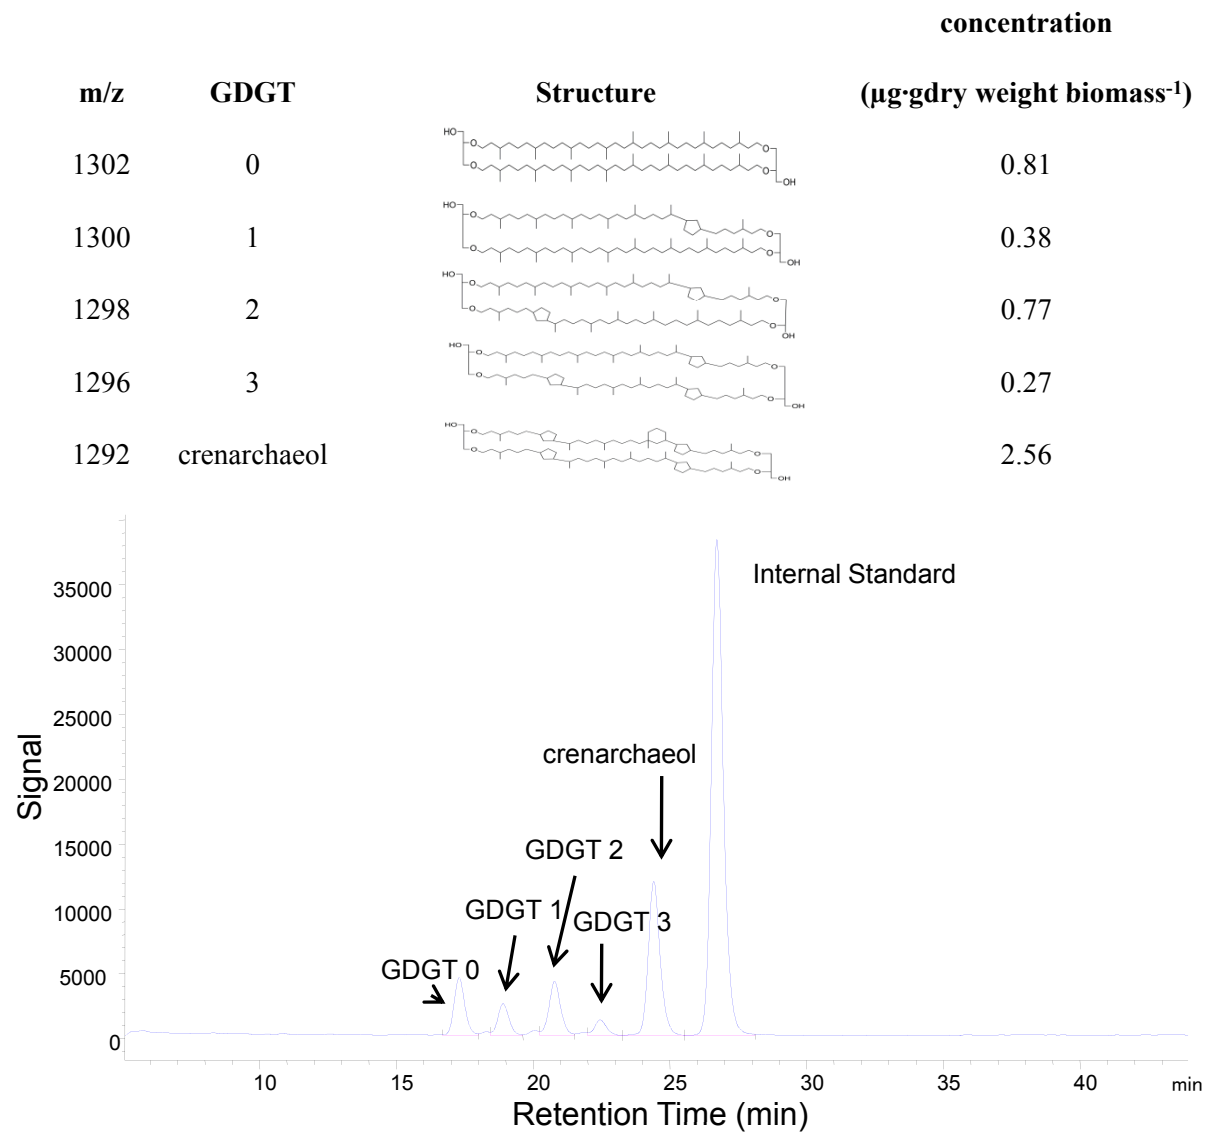

**Fig. S3.** Base peak chromatogram of LC/MS analysis of GDGTs in the bioreactor. Concentrations of specific GDGTs and their structures are indicated.

| Description                                    | Gene | ID        | Reads |
|------------------------------------------------|------|-----------|-------|
| NH <sub>4</sub> <sup>+</sup> transport protein | amtB | Nmar_1698 | 12    |
| Nitrogen regulator protein PII                 | glnK | Nmar_1523 | 9     |
| Cytochrome c oxidase                           | ccoI | Nmar_0184 | 7     |
| Ammonia monooxygenase                          | amoA | Nmar_1500 | 14    |
| Ammonia monooxygenase                          | amoB | Nmar_1500 | 27    |
| Ammonia monooxygenase                          | amoC | Nmar_1500 | 8     |
| Multicopper oxidase                            | mco3 | Nmar_1354 | 5     |
| Hypothetical protein                           | ompA | Nmar_1528 | 5     |
| NH <sub>4</sub> <sup>+</sup> transport protein | amtB | Nmar_0588 | 2     |

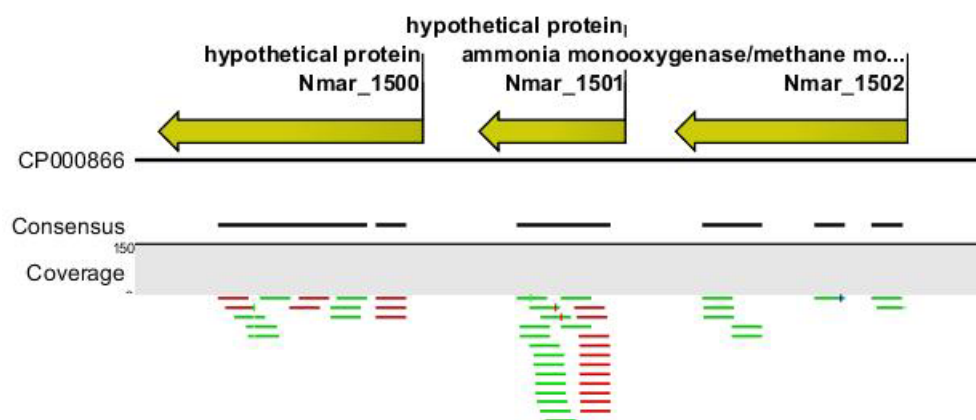

**Fig. S4.** Gene expression of selected *Nitrosopumilus maritimus* SCM1 genes under oxygen limitation.

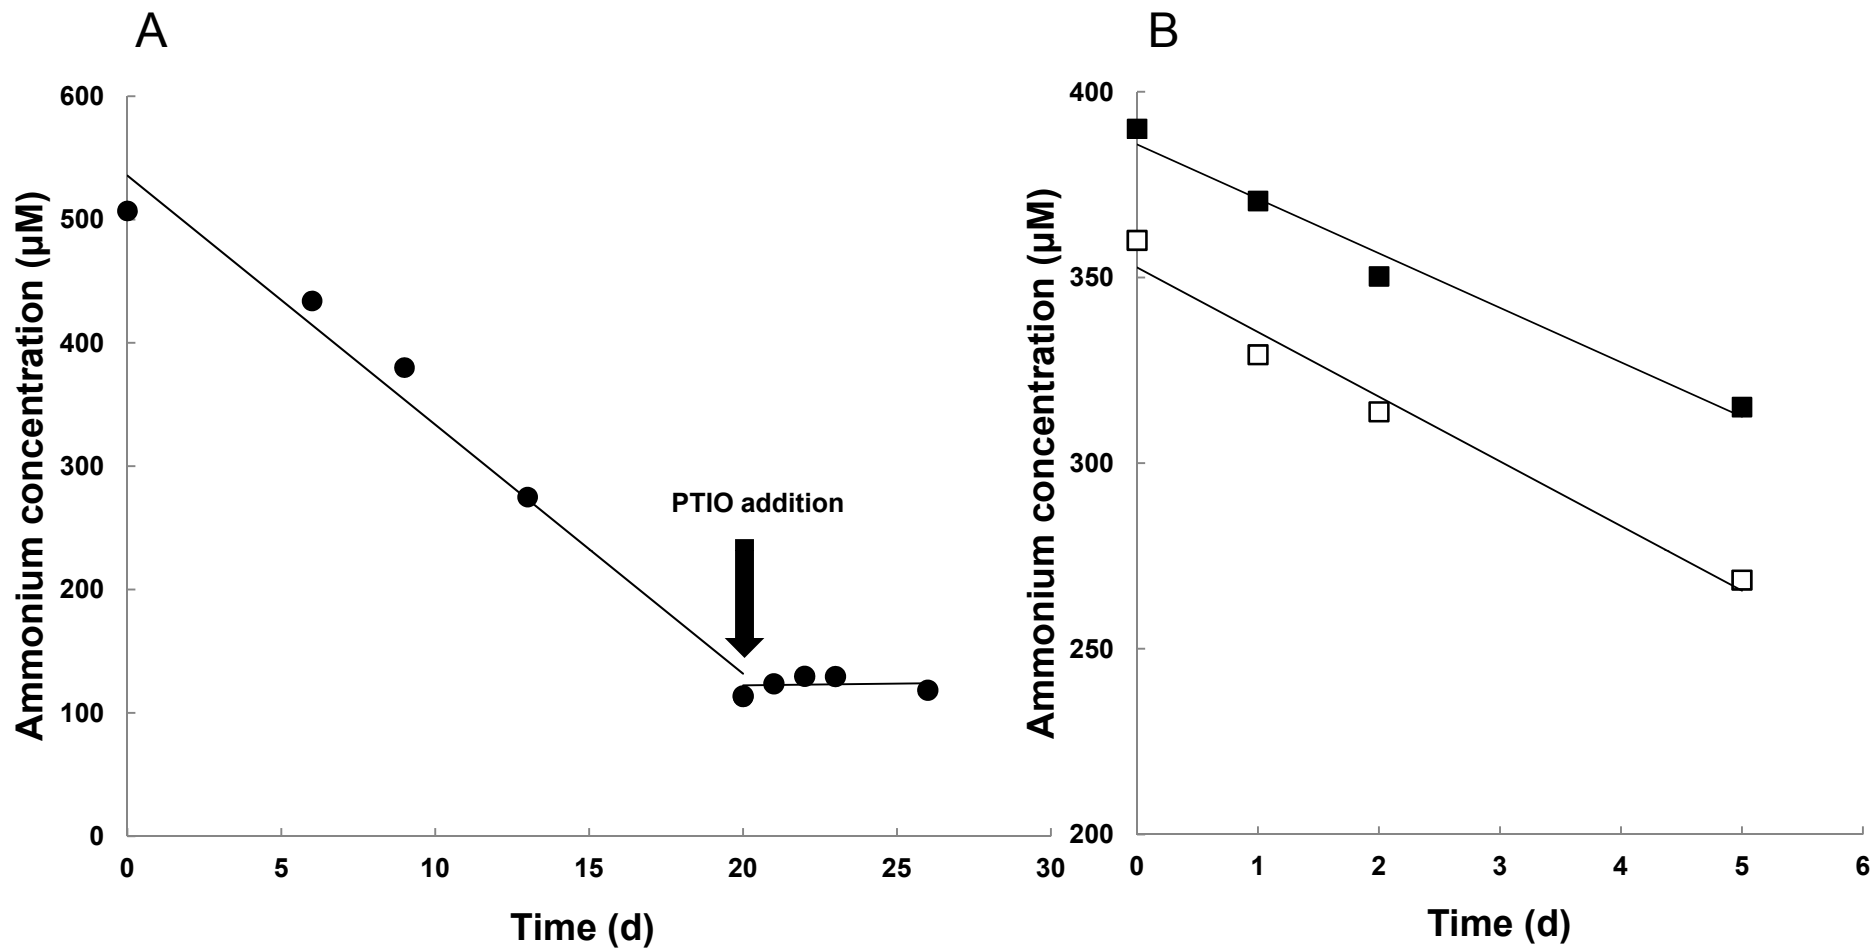

**Fig. S5.** Potential aerobic ammonia-oxidizing activity of the *Nitrosopumilus maritimus* culture (A) and *Nitrosomonas*-like AOB enrichment (B). Open squares (□) and closed squares (■) indicate AOB enrichment with and without PTIO addition, respectively.
